# Supplementary material
Source: publisher figshare collection journal article supplement (https://karger.figshare.com/ndownloader/files/22746329)
Supplement: Supplementary file 1 [file 22746329]

**Supplementary table 2.**

Number of samples used in for RNA, western blot and IHC analysis.

| **Method** | **Aortic aneurysm** | **Control** |
| --- | --- | --- |
| RNA from aorta | n=16 (14 males), 72 ± 5.4 years, (aorta ∅ 66 ± 16.5 mm) | n=9 (7 males), 45 ± 13.4 years, (aorta ∅ < 30 mm) |
| Western blot and IHC on aorta | n=5, (4 males), 75 ± 3.1 years, (aorta ∅ 7 ± 2.2 mm) | n=4 (all males), 34 ± 11.1 years, (aorta ∅ < 30 mm) |

IHC: Immunohistochemistry
